# Supplementary material
Source: PubMed Central journal article supplement (PMC4597318)

Kuo and Krasnow, Fig. S1

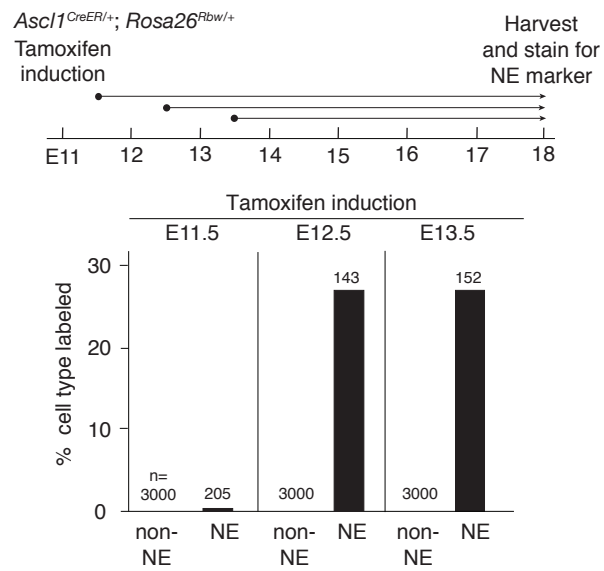

Supplement: NIHMS722770-supplement-1.pdf [file NIHMS722770-supplement-1.pdf]

Kuo and Krasnow, Fig. S2

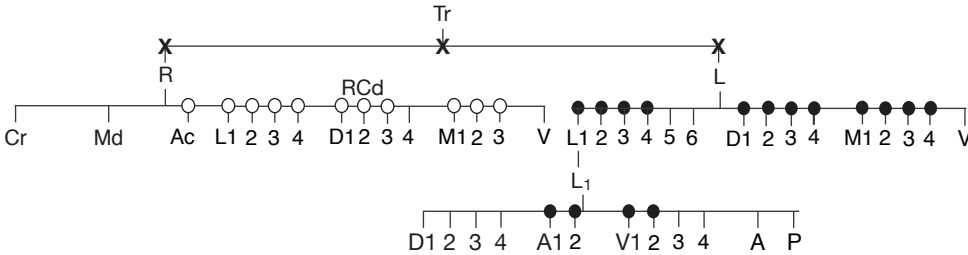

Supplement: NIHMS722770-supplement-2.pdf [file NIHMS722770-supplement-2.pdf]

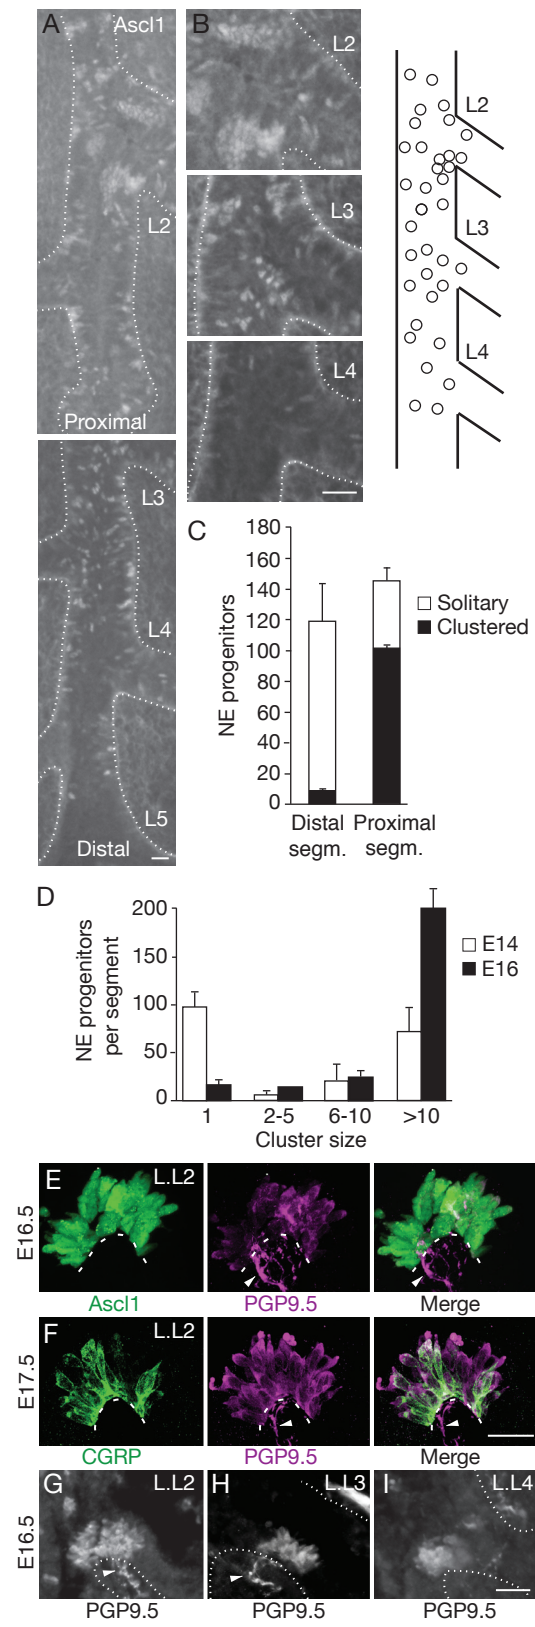

Supplement: NIHMS722770-supplement-3.pdf [file NIHMS722770-supplement-3.pdf]

Kuo and Krasnow, Fig. S4

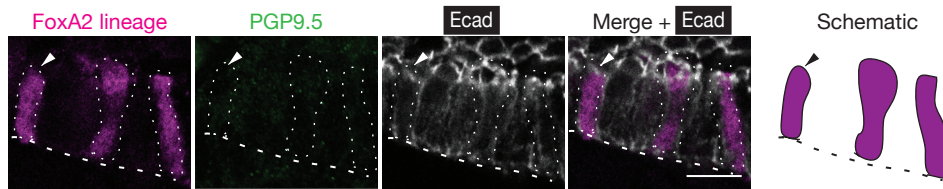

Supplement: NIHMS722770-supplement-4.pdf [file NIHMS722770-supplement-4.pdf]

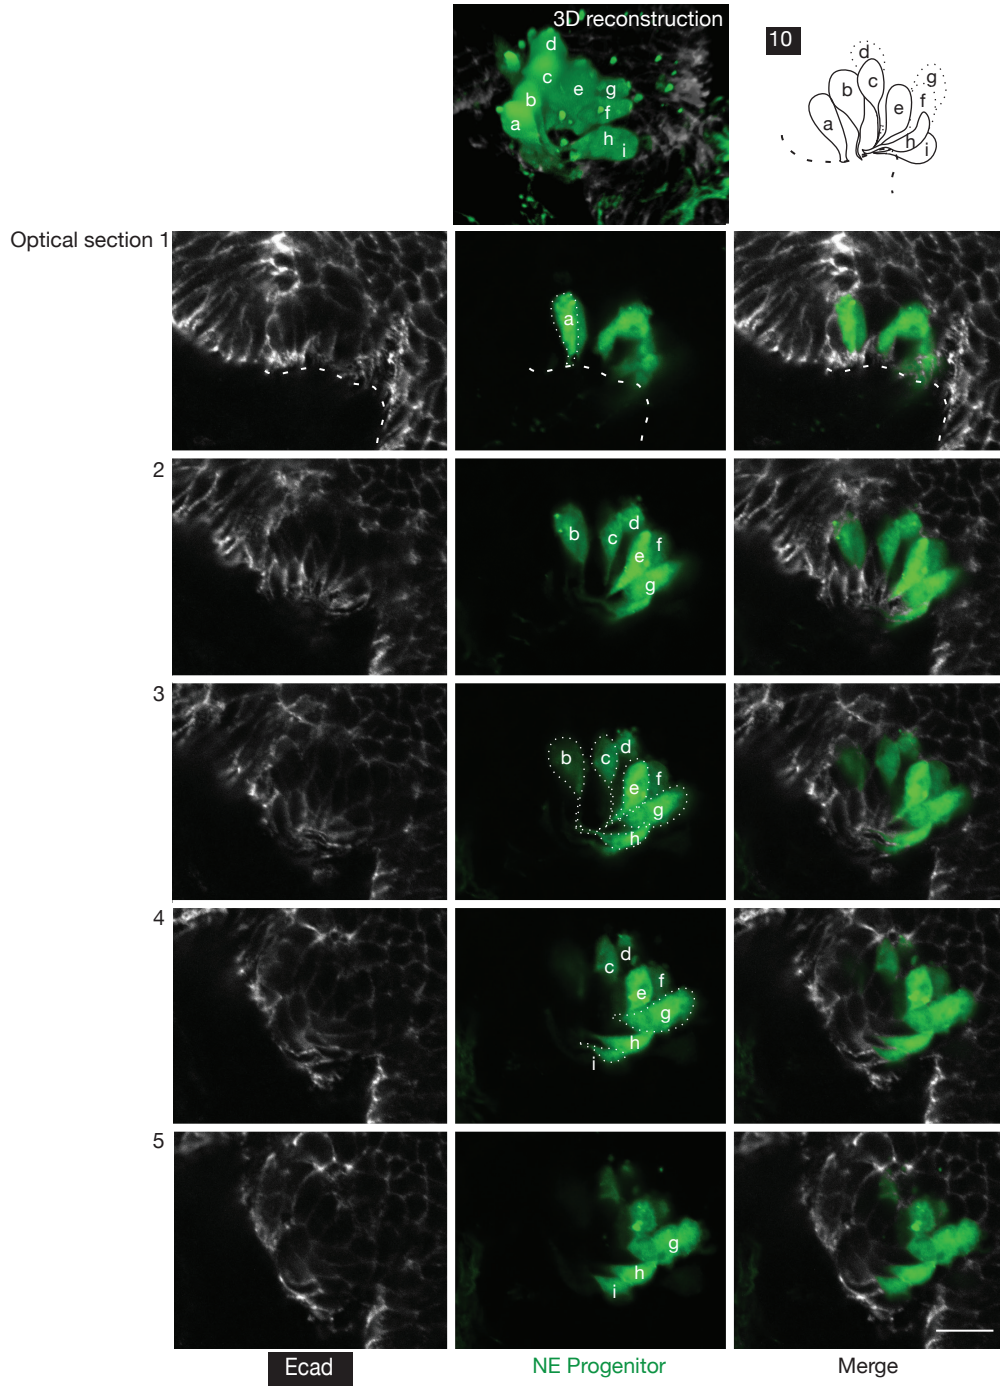

Supplement: NIHMS722770-supplement-5.pdf [file NIHMS722770-supplement-5.pdf]

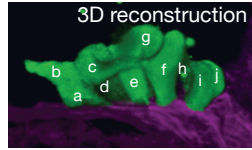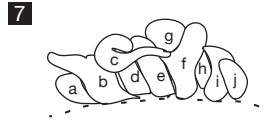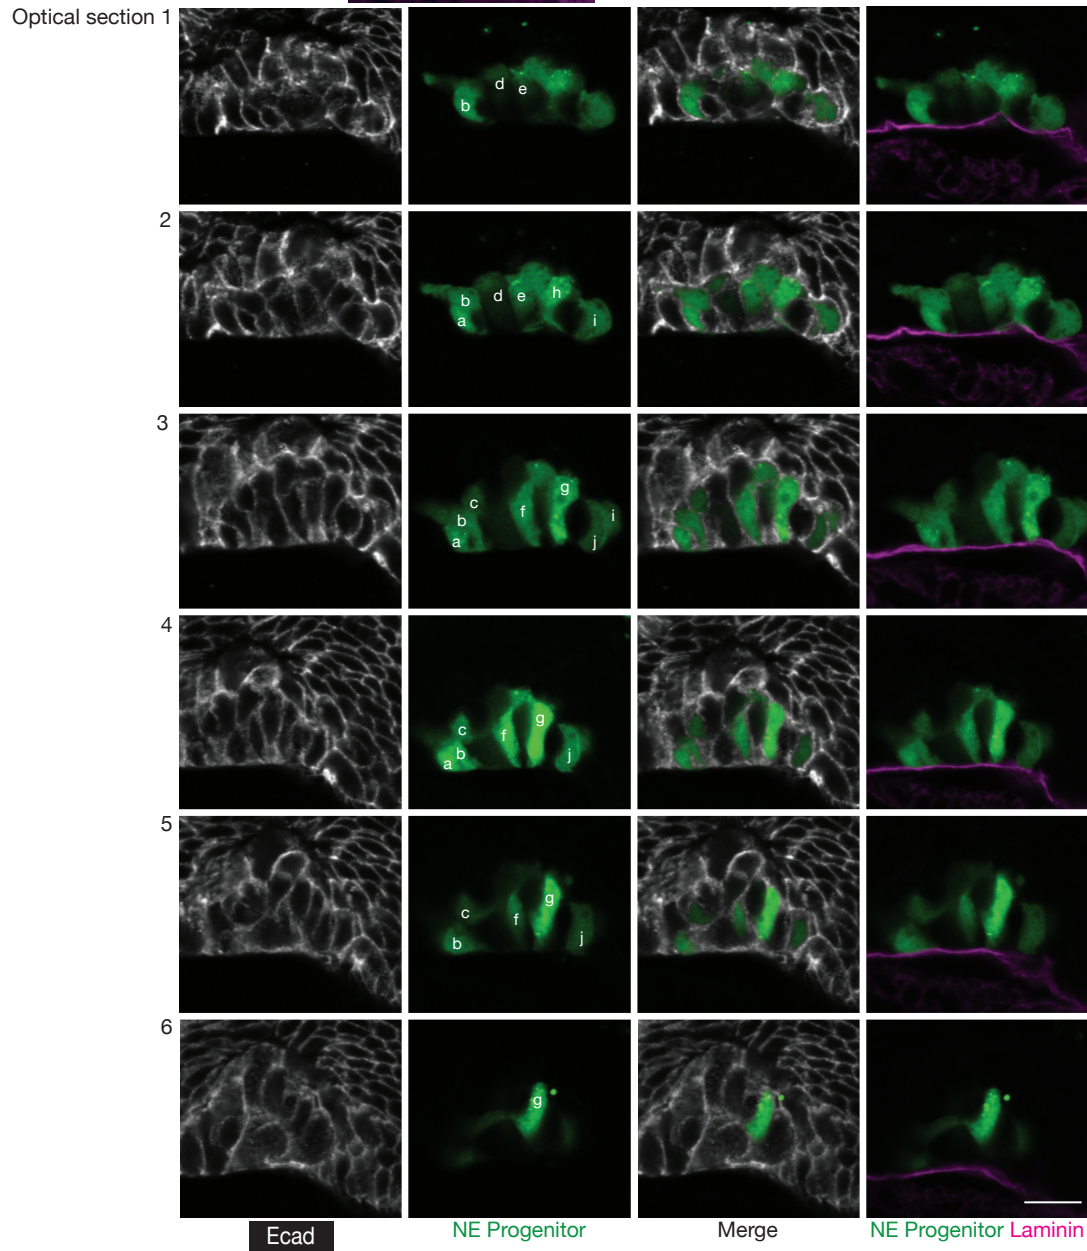

Supplement: NIHMS722770-supplement-6.pdf [file NIHMS722770-supplement-6.pdf]

Kuo and Krasnow, Fig. S7

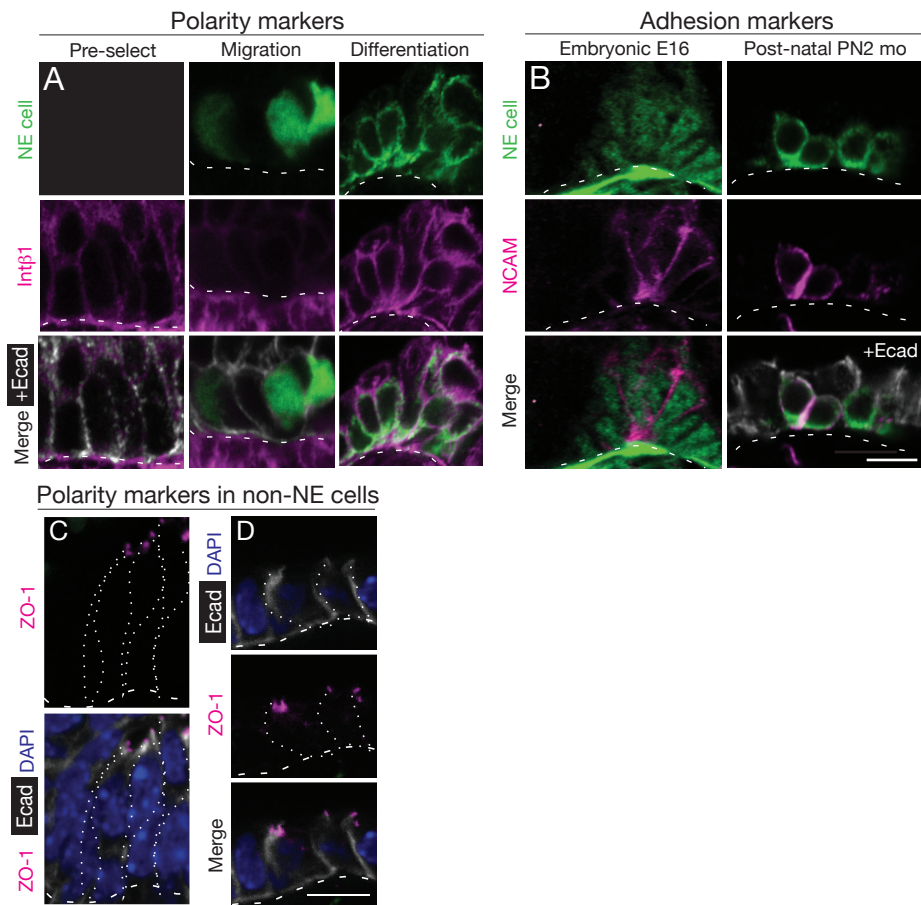

Supplement: NIHMS722770-supplement-7.pdf [file NIHMS722770-supplement-7.pdf]
